## Supplementary information

### Table S1

**The ancient human Y haplogroup database.** The database provides for each sample its age, country, site location, geographical region, geographical coordinates, given and revised periods, culture name, haplogroup, the type of haplogroup SNPs provided in the publication, coverage, and the reference.

This table is available via <https://github.com/eelhaik/aYDB>

Figure S1

**The geographical distribution of the sites for the 1797 ancient Eurasian haplogroups over time.** The location of each archaeological site is marked as a red dot.

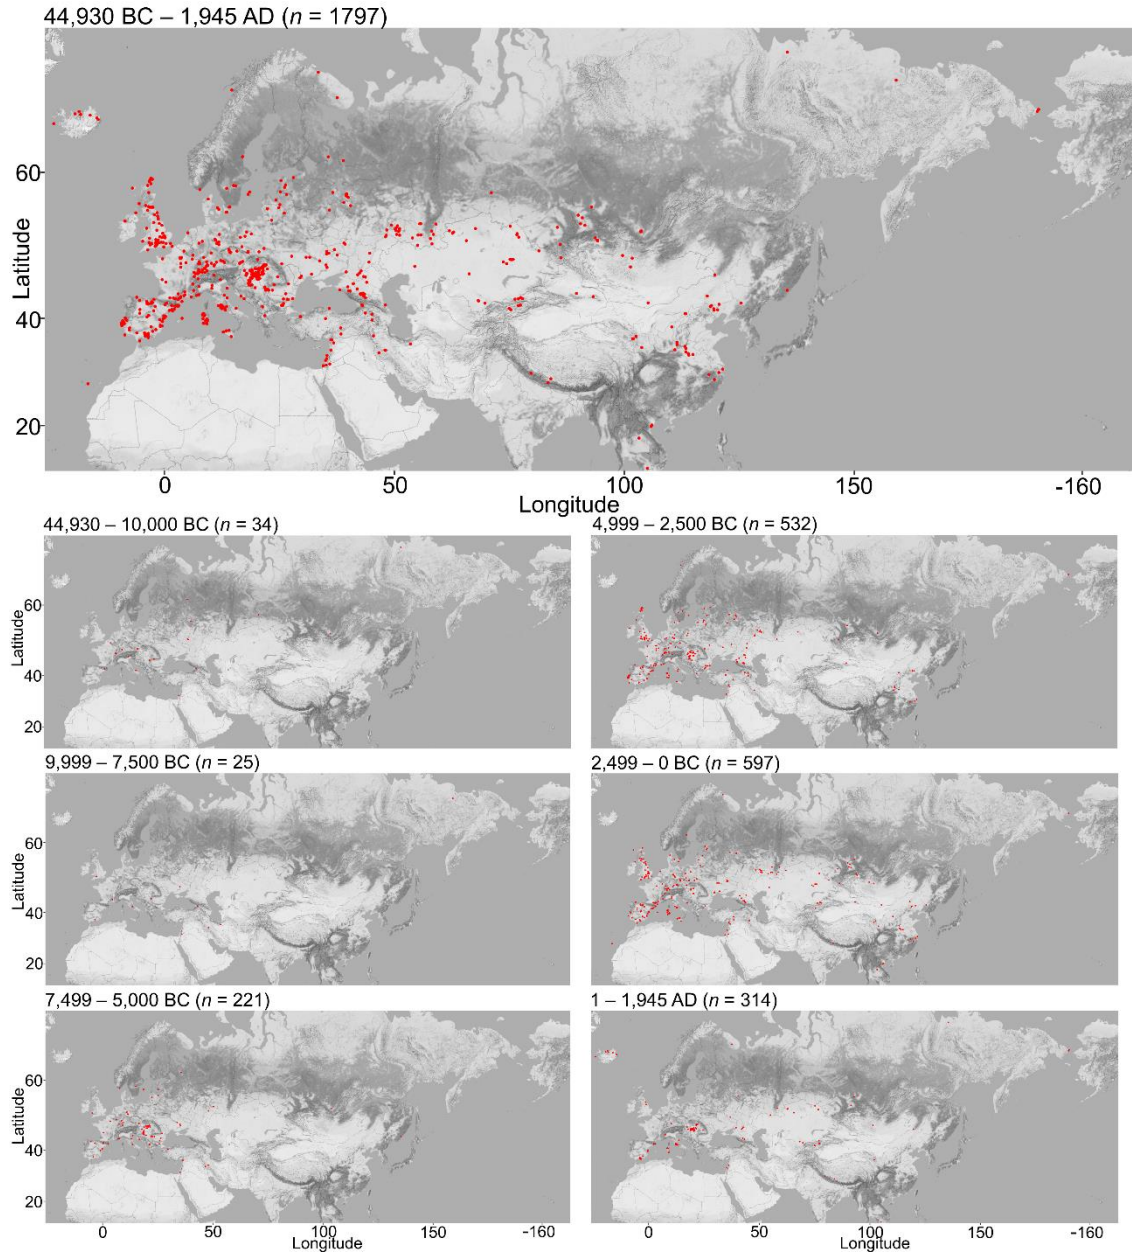

Source: http://academic.oup.com/nargab/article-pdf/2/4/lqaa081/34054772/lqaa081.pdf
